1 **Changing pattern in presentation of infective conjunctivitis during COVID-19**  
2 **pandemic in a tertiary eye hospital in Nepal**

3 Thinley<sup>1\*</sup>, Reeta Gurung<sup>1¶</sup>, Hom Bahadur Gurung<sup>1¶</sup>, Manish Poudel<sup>1&</sup>, Pradeep  
4 Banjara<sup>1&</sup>

5

6 <sup>1</sup> Tilganga Institute of Ophthalmology, Gaushala, Kathmandu, Nepal.

7 <sup>1\*</sup> Current address: Department of Ophthalmology, Eastern Regional Referral Hospital,  
8 Mongar 43001, Bhutan.

9

10 **Corresponding Author:**

11 Thinley

12 General Ophthalmologist

13 Department of Ophthalmology, Eastern Regional Referral Hospital

14 Mongar, Bhutan.

15 Postal code: 43001

16 Phone no.: +975-17797220

17 Email: [droduelhamo@gmail.com](mailto:droduelhamo@gmail.com)

18

19

20

21 **Abstract**

22 **Purpose:** To evaluate changes in the pattern of presentation of infective conjunctivitis  
23 during COVID-19 pandemic at a Tertiary Eye Hospital in Nepal.

24 **Methods:** This was a single-center retrospective cross-sectional study that analyzed  
25 cases of infective conjunctivitis at Tilganga Institute of Ophthalmology, Nepal from  
26 January 2018 to December 2022 using data from electronic medical records. The data  
27 from 2020 and 2021 were considered as the COVID era. Cases of corneal foreign body  
28 during the same period were used as a control.

29 **Results:** The number of cases of infective conjunctivitis decreased by 64.86% (95% CI,  
30 -64.82% to -64.94%;  $p < 0.001$ ) during the COVID-19 pandemic. Sharp decrease was  
31 noted after the implementation of lockdowns and preventive measures. However, in  
32 post-pandemic era, the number of cases increased by 24.6 % ( 95% CI, +24.57% to  
33 +24.66%;  $P < 0.001$ ). In contrast, the cases of corneal foreign body increased by 41.63  
34 % ( 95% CI, +41.59% to +41.66%;  $p < 0.001$ ).

35 **Conclusion:** The number of cases of infective conjunctivitis at our hospital decreased  
36 significantly during the COVID-19 pandemic. This reduction in number and change in  
37 pattern of presentation might be attributed to the widespread implementation of  
38 preventive public health measures during the pandemic period.

39 **Key words:** infective conjunctivitis; COVID-19 pandemic; preventive measures; public  
40 health

41

## 42 **Introduction**

43 Infective conjunctivitis is a common eye condition characterized by inflammation of the  
44 conjunctiva, typically caused by viral or bacterial infections (1). Acute conjunctivitis,  
45 commonly called as pink eye, is highly contagious and very common condition. It is  
46 estimated that conjunctivitis accounts for 1% to 2% of primary care visits in the USA (2)  
47 and accounts for almost one-third of all eye related visits in emergency departments (3)  
48 .

49 Acute viral conjunctivitis is transmitted through close personal contact, fomites, droplets  
50 in the air, and poor hand hygiene(4) (5). Despite infection control programs and  
51 measures, acute viral conjunctivitis continues to be a source of public health concern  
52 and a substantial economic burden (6) (7).

53 During the COVID-19 pandemic, our tertiary eye hospital in Nepal observed a  
54 noticeable reduction in the number of cases presenting with infective conjunctivitis to  
55 both emergency and outpatient departments. This reduction in cases was hypothesized  
56 to be due to the robust implementation of preventive public health measures such as  
57 frequent hand hygiene, wearing face masks, and maintaining social distancing.

58 This hypothesis is supported by studies that have shown a decrease in the overall  
59 incidence of respiratory infections, including conjunctivitis, during the COVID-19  
60 pandemic when these preventive measures were widely practiced (8). These measures  
61 have been shown to be effective in reducing the transmission of respiratory viruses,  
62 including COVID-19 and adenovirus – a common cause of viral conjunctivitis (9).

63 Furthermore, there have been reports of conjunctivitis being associated with COVID-19  
64 infection. However, the literature on this association is limited and conflicting. Although it  
65 has been reported that viral conjunctivitis can be associated with COVID-19, the causal  
66 relationship between ocular manifestations and SARS-COV-2 infection is yet to be  
67 elucidated (10) (11) (12).

68 This study aimed to evaluate the changes in the pattern of presentation of infective  
69 conjunctivitis at Tilganga Institute of Ophthalmology (TIO) over the span of five years,  
70 distributed into pre-COVID, COVID and post-COVID eras.

71

## 72 **Materials and Methods**

73 This was a retrospective analysis of the data on infective conjunctivitis spanning five  
74 years, from January 1st, 2018 to December 31st, 2022. The study searched for data on  
75 cases of conjunctivitis presenting to the emergency department (ER) and outpatient  
76 departments (OPD) of Tilganga Institute of Ophthalmology, using the Institute's  
77 electronic medical records (EMR). The data was accessed between January 23, 2023  
78 to April 30, 2023. The data thus obtained were cleaned and sorted using Microsoft  
79 Excel 2016. The data from the years 2018 and 2019 were considered as that of pre-  
80 COVID era; 2020 and 2021 as the COVID era, and that of 2022 as the post-COVID era.  
81 For comparison purposes, the data from 2018, 2021, and 2022 were used as that of  
82 pre-COVID, COVID and post-COVID eras, respectively.

83 The study included the cases of infective conjunctivitis, based on the presumptive  
84 diagnosis and treatments provided by the treating ophthalmologist or resident doctors.  
85 Cases of allergic conjunctivitis and other types of conjunctivitis were excluded.

86 The cases of corneal foreign body that presented to our hospital during the study period  
87 were used as a control.

88 The data was then transferred to and analyzed using SPSS version 20. T-test was used  
89 to compare the data of the COVID-era with that of pre and post-COVID eras. All  
90 statistically significant analyses were calculated, and the results are presented in the  
91 form of percentage, mean, graphs, and charts. P-value of less than 0.05 was  
92 considered statistically significant.

93 The study was approved by the Institutional Review Board of Tilganga Institute of  
94 Ophthalmology (Ref: 20/2022 dated 21<sup>st</sup> Oct. 2022). Informed consent was not obtained  
95 for this study since the data was analyzed anonymously. The study has adhered with  
96 the Declarations of Helsinki.

97

98

99

100

101

102

## 103 **Results**

### 104 **Patient demography**

105 Among the total of 16,853 cases of infective conjunctivitis during the study period,  
106 9,476(56.2%) were male and 7,377(44.8%) were female. The mean (SD) age of the  
107 patients was 32.9(19.1) years.

108 In the pre-COVID era, the number of infective conjunctivitis cases visiting our hospital  
109 (out of total patient attendance) was 5,235(1.8%) and 5,871(1.9%) in 2018 and 2019,  
110 respectively. In the COVID era, the figures decreased to 1,878(1.3%) and 1,396(0.6%)  
111 cases in 2020 and 2021 respectively. However, in the post-COVID era (2022), the  
112 number of cases increased to 2,313(0.8%).

### 113 **Figure 1**

114 The mean(SD) monthly cases of infective conjunctivitis presenting to our hospital were  
115 436(142.49) and 492(156.31) in 2018 and 2019(Pre-COVID era), respectively. This  
116 number dropped significantly to a mean(SD) of 161(125.94) and 122(34.95) in 2020 and  
117 2021(COVID era), respectively. A consistent trend of increase in the number of cases of  
118 infective conjunctivitis was observed from June through October during 2018 and 2019.  
119 In contrast, the number of cases decreased sharply from April 2020 and remained low  
120 throughout the year, with a monthly mean(SD) of 91.40(23.9), and a similar pattern  
121 continued into the subsequent year (2021). The sharp decline in the number of cases  
122 coincided with the implementation of lockdowns. However, in 2022(post-COVID era),  
123 the number of cases began to rise again and followed a monthly distribution pattern

124 similar to that of pre-COVID era. Nevertheless, the number of cases remained well  
 125 below the pre-COVID average (**Figure 1**).

126 The number of cases of infective conjunctivitis presenting to our hospital decreased by  
 127 64.86% (95% CI, -64.82% to -64.94%;  $p < 0.001$ ) during the COVID era. However, in the  
 128 post-COVID era, the cases increased by 24.62% (95% CI, +24.57% to +24.66%;  
 129  $p < 0.001$ ). In contrast, the cases of corneal foreign body showed an increase of 41.63%  
 130 (95% CI, +41.59% to +41.66%;  $p < 0.001$ ) during the pandemic (**Table 1**).

131

132 **Table 1. Comparison between cases of infective conjunctivitis and corneal**  
 133 **foreign body**

| COVID eras | Year | Total no. of Patients | No. of cases of Infective conjunctivitis † | No. of cases of corneal foreign body* | Percentage changes       | P-value          |
|------------|------|-----------------------|--------------------------------------------|---------------------------------------|--------------------------|------------------|
| Pre-COVID  | 2018 | 282729                | 5233 (1.85)                                | 1098 (0.39)                           |                          |                  |
| COVID      | 2021 | 225813                | 1468 (0.65)                                | 1242 (0.55)                           | 64.8% ↓ †<br>41.63% ↑ *  | <0.001<br><0.001 |
| Post-COVID | 2022 | 286690                | 2313 (0.81)                                | 1364 (0.48)                           | 24.6 % ↑ †<br>13.50% ↓ * | <0.001<br><0.001 |

134 *Note: † Infective conjunctivitis*

135 *\* Corneal foreign body*

136

137

138

139 **Figure 2**

140 It was observed that the most affected age groups were 21-30 and 31-40 years of age.  
141 The result also showed that the number of cases of infective conjunctivitis presenting to  
142 our center were significantly higher in the pre-COVID era irrespective of the age groups  
143 (Fig. 2).

144

145

146 **Discussion**

147 After the onset of COVID-19 pandemic in December 2019, a noticeable decrease in the  
148 number of cases of infective conjunctivitis visiting the emergency and outpatient  
149 departments of our hospital was observed. The emergency department of TIO, which  
150 usually used to see many cases of conjunctivitis, experienced a perceptible drop during  
151 the pandemic period.

152 The results of our study have shown that the number of cases of infective conjunctivitis  
153 presenting to our hospital had decreased significantly during the pandemic. The number  
154 of cases of infective conjunctivitis fell by 64.86% during the pandemic era. The  
155 decrease in the number of cases correlates well with the time of enforcement of  
156 lockdowns. This result may suggest that the public health measures implemented  
157 during those time to curb the spread of COVID-19 virus, impacted positively in  
158 controlling the transmission of infective conjunctivitis as well.



159 However, the reduction in cases of infective conjunctivitis could be confounded by the  
160 fact that many patients might have refrained from visiting the hospital during the  
161 pandemic either due to fear of contracting COVID-19 or due to mobility restrictions  
162 imposed during those times. As a control, we looked at the number of cases of corneal  
163 foreign bodies presenting to our hospital during the corresponding period, which  
164 contrarily had increased. Werkl et al. also reported a similar result (9). The surge in  
165 corneal foreign body cases at our center during the pandemic could be attributed to the  
166 closure of the majority of other clinics during that period. Nevertheless, this implies that  
167 the eye care-seeking behavior of the patients did not change much despite the  
168 challenges of the pandemic period.

169 Similar to our study, in a single academic center in the US, the cases of non-allergic  
170 conjunctivitis presenting to emergency department was noted to fall by 37.3% and in the  
171 same study the internet search interest in US for conjunctivitis also decreased by 34.2%  
172 after widespread implementation of public health interventions to mitigate COVID-19 (2).  
173 Similarly in a Spanish primary level hospital, the ophthalmological emergencies reduced  
174 by 37.4% (13).

175 Our data also show significant changes in the annual distribution pattern of infective  
176 conjunctivitis during the pandemic period. Prior to and after the COVID-19 era, the  
177 prevalence of infective conjunctivitis was higher during the months of June through  
178 October. However, this pattern was not observed during the pandemic. Similar trend  
179 was observed in a study wherein the highest number of cases of adenoviral  
180 conjunctivitis was noted from July to September (14).

181 Our results also have shown that infective conjunctivitis affects the adult males more.  
182 Similar preponderance in adult male gender was observed in a study by Shrestha SP.  
183 et al (15). This result indicates that infective conjunctivitis is more prevalent among  
184 mobile and productive working age groups, which may translate into the economic  
185 burden associated with this condition.

186 The results of our study might suggest that the preventive measures implemented to  
187 restrained COVID-19 disease can also be applied to prevent the spread of infective  
188 conjunctivitis. And the data about the annual distribution pattern of infective  
189 conjunctivitis can help policy makers to implement effective countermeasures.

190 In conclusion, according to our data, the total number of cases of infective conjunctivitis  
191 decreased significantly during the COVID-19 pandemic along with the change in the  
192 annual distribution pattern. This reduction in the number and the change in the pattern  
193 of presentation may be attributed to the widespread implementation of preventive public  
194 health measures during the pandemic period.

195

## 196 **Acknowledgements**

197 We would like to extend our gratitude to Mr. Sudhatma Karki and Mr. Jenish Gorkhali  
198 from the Information Technology (IT) Department of Tilganga Institute of Ophthalmology  
199 for facilitating us with the necessary data of the patients for this study.

200

## 201 **Financial disclosure**

202 There is no financial disclosure to me made with regard to this study.

## 203 References

204

- 205 1. Alfonso SA, Fawley JD, Lu XA. Conjunctivitis. *Prim Care - Clin Off Pract*.  
206 2015;42(3):325–45.
- 207 2. Lavista Ferres JM, Meirick T, Lomazow W, Lee CS, Lee AY, Lee MD. Association  
208 of Public Health Measures during the COVID-19 Pandemic with the Incidence of  
209 Infectious Conjunctivitis. *JAMA Ophthalmol*. 2021;98104:1–7.
- 210 3. Ramirez DA, Porco TC, Lietman TM, Keenan JD. Epidemiology of conjunctivitis in  
211 US emergency departments. *JAMA Ophthalmol*. 2017;135(10):1119–21.
- 212 4. Nauheim RC, Romanowski EG, Araullo-Cruz T, Kowalski RP, Turgeon PW,  
213 Stopak SS, et al. Prolonged Recoverability of Desiccated Adenovirus Type 19  
214 from Various Surfaces. *Ophthalmology* [Internet]. 1990;97(11):1450–3. Available  
215 from: [http://dx.doi.org/10.1016/S0161-6420\(90\)32389-8](http://dx.doi.org/10.1016/S0161-6420(90)32389-8)
- 216 5. Azar MJ, Dhaliwal DK, Bower KS, Kowalski RP, Gordon YJ. Possible  
217 consequences of shaking hands with your patients with epidemic  
218 keratoconjunctivitis. *Am J Ophthalmol* [Internet]. 1996;121(6):711–2. Available  
219 from: [http://dx.doi.org/10.1016/S0002-9394\(14\)70640-3](http://dx.doi.org/10.1016/S0002-9394(14)70640-3)
- 220 6. Shekhawat NS, Shtein RM, Blachley TS, Stein JD. Antibiotic Prescription Fills for  
221 Acute Conjunctivitis among Enrollees in a Large United States Managed Care  
222 Network. *Ophthalmology* [Internet]. 2017;124(8):1099–107. Available from:  
223 <http://dx.doi.org/10.1016/j.ophtha.2017.04.034>
- 224 7. Lee CS, Lee AY, Akileswaran L, Stroman D, Najafi-Tagol K, Kleiboeker S, et al.  
225 Determinants of Outcomes of Adenoviral Keratoconjunctivitis. *Ophthalmology*.  
226 2018;125(9):1344–53.
- 227 8. Olsen SJ, Azziz-Baumgartner E, Budd AP, Brammer L, Sullivan S, Pineda RF, et  
228 al. Decreased influenza activity during the COVID-19 pandemic—United States,  
229 Australia, Chile, and South Africa, 2020. *Am J Transplant* [Internet].  
230 2020;20(12):3681–5. Available from: <https://doi.org/10.1111/ajt.16381>
- 231 9. Werkl P, Hoeflechner L, List W, Lindner E. The impact of social distancing on  
232 conjunctivitis cases—a retrospective single-center observation report. *Graefe’s*  
233 *Arch Clin Exp Ophthalmol* [Internet]. 2021;(0123456789):10–2. Available from:  
234 <https://doi.org/10.1007/s00417-021-05392-w>
- 235 10. Güemes-villahoz N, Burgos-blasco B, García-feijoó J, Sáenz-francés F, Arriola-  
236 villalobos P, Martínez-de-la-casa JM, et al. Conjunctivitis in COVID-19 patients :  
237 frequency and clinical presentation. 2020;2501–7.
- 238 11. Sen M, Honavar SG, Sharma N, Sachdev MS. COVID-19 and Eye: A Review of  
239 Ophthalmic Manifestations of COVID-19 PMID: Quick Response Code. 2021

- 240 [cited 2022 Aug 20]; Available from: [www.ijo.in](http://www.ijo.in)
- 241 12. Wu P, Luo C, Liu Q, Qu ; Xingguang, Liang L, Wu K. Characteristics of Ocular  
242 Findings of Patients With Coronavirus Disease 2019 (COVID-19) in Hubei  
243 Province, China. *JAMA Ophthalmol* [Internet]. 2020;138(5):575–8. Available from:  
244 <https://jamanetwork.com/>
- 245 13. González-Martín-Moro J, Guzmán-Almagro E, Izquierdo Rodríguez C, Fernández  
246 Hortelano A, Lozano Escobar I, Gómez Sanz F, et al. Impact of the COVID-19  
247 Lockdown on Ophthalmological Assistance in the Emergency Department at a  
248 Spanish Primary Level Hospital. *J Ophthalmol*. 2021;2021:1–9.
- 249 14. Lee J, Bilonick RA, Romanowski EG, Kowalski RP. Seasonal Variation in Human  
250 Adenovirus Conjunctivitis: A 30-Year Observational Study. *Ophthalmic Epidemiol*  
251 [Internet]. 2018;25(5–6):451–6. Available from:  
252 <https://doi.org/10.1080/09286586.2018.1509096>
- 253 15. Shrestha SP, Khadka J, Pokhrel AK, Sathian B. Acute bacterial conjunctivitis -  
254 antibiotic susceptibility and resistance to commercially available topical antibiotics  
255 in Nepal. *Nepal J Ophthalmol*. 2016;8(15):23–35.

256

257

## 258 **Figure Legends:**

259 **Figure 1:** Monthly distribution of infective conjunctivitis cases in different years.

260 The number of cases dropped sharply from April 2020 and remained low throughout the  
261 year and a similar pattern continued into the subsequent year (2021). The sharp decline  
262 in cases coincided with the implementation of lockdowns. However, in 2022 (post-  
263 COVID era), the number of cases began to rise again and followed a monthly  
264 distribution pattern similar to that of pre-COVID era.

265 **Figure 2:** Distribution of infective conjunctivitis cases in different age groups.

266 The most affected age groups are 21-30 and 31-40 years of age. The result also  
267 showed that the number of cases of infective conjunctivitis presenting to our center  
268 were significantly higher in the pre-COVID era irrespective the age groups.

# Monthly case distribution in differet years

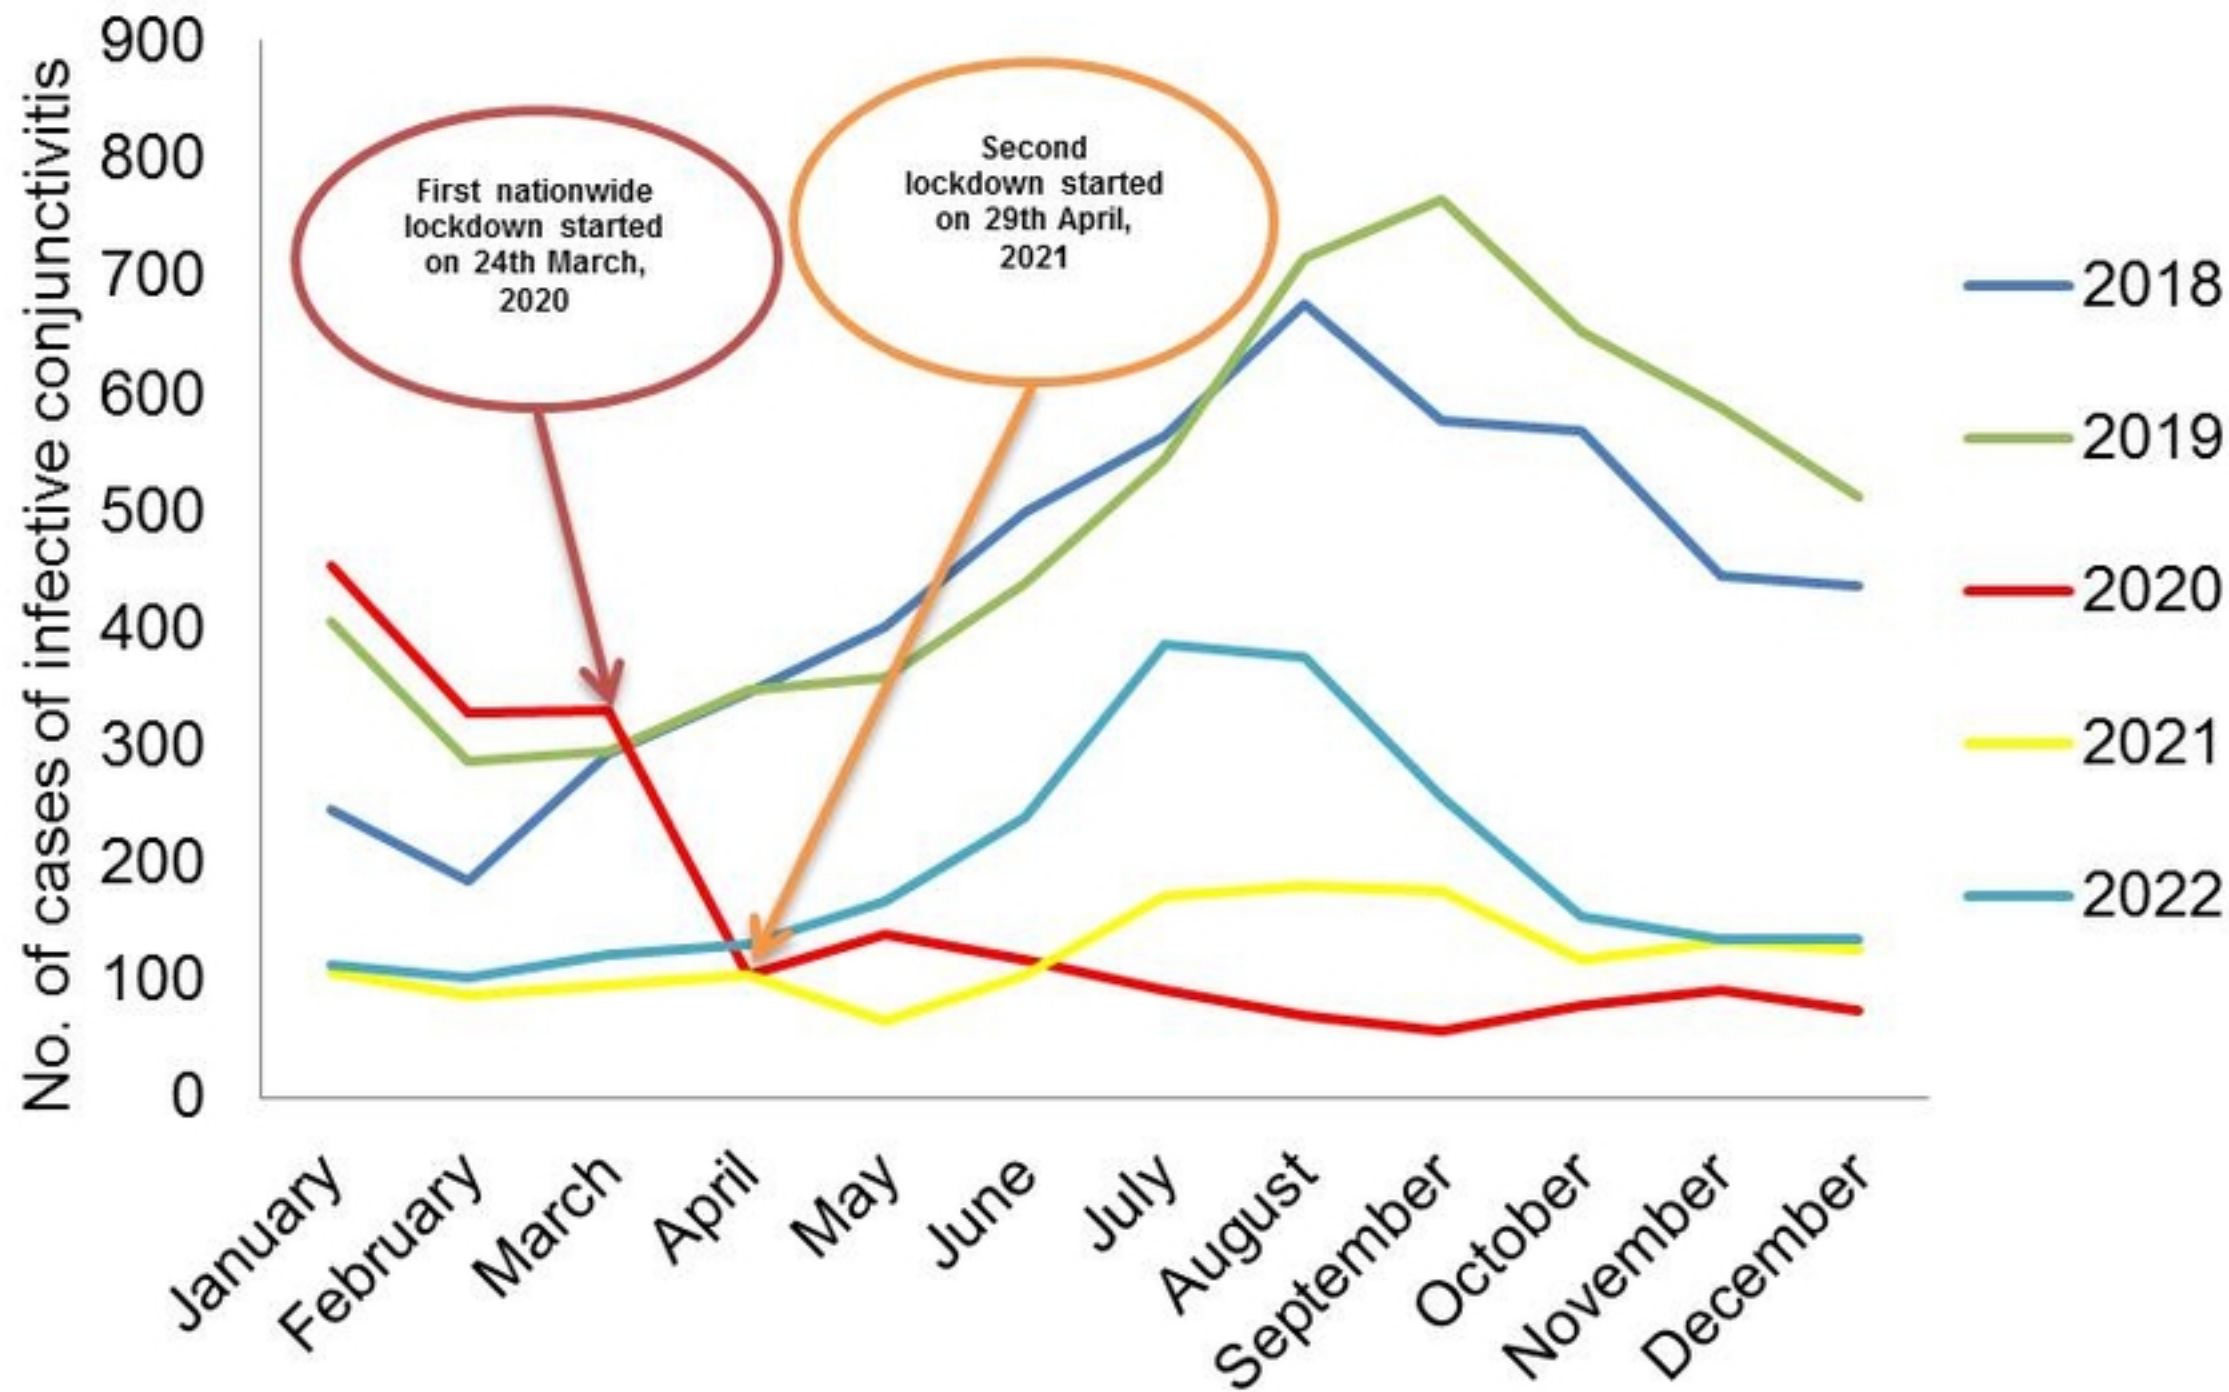

Figure

### Distribution of cases according to age groups

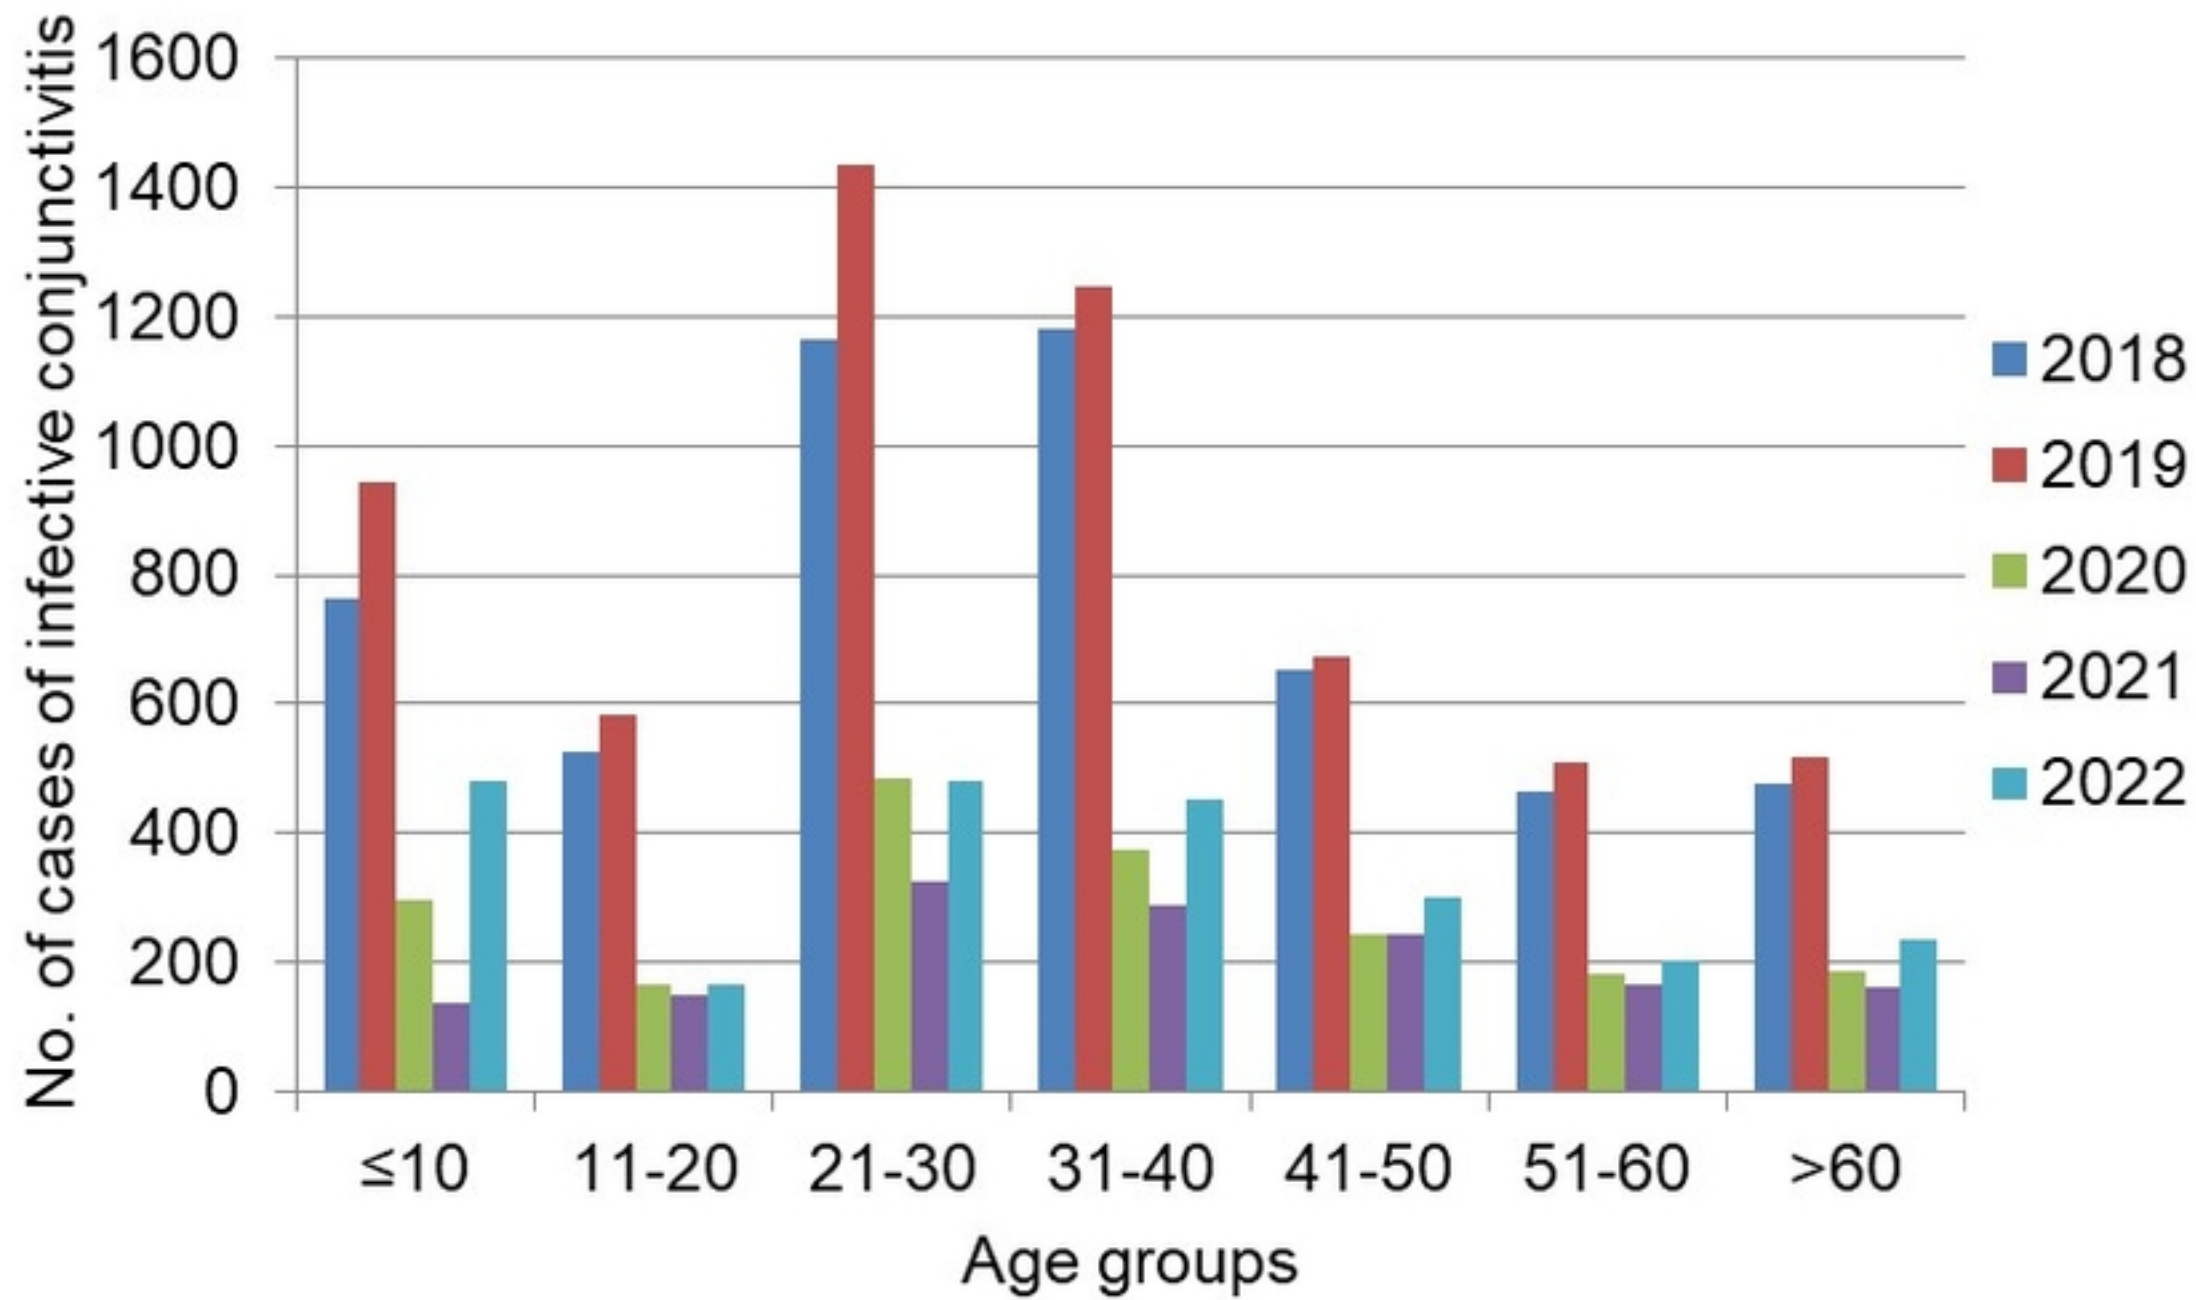

Figure
